# Supplementary material for: Efficacy of Environmental Cleaning Protocol Featuring Real-Time Feedback with and without PX-UV in Reducing the Contamination of Gram-Negative Microorganisms on High-Touch Surfaces in Four Intensive Care Units in Thailand
Source: Antibiotics (Basel). 2023 Feb 22;12(3):438. doi: 10.3390/antibiotics12030438 (PMC10044567; doi:10.3390/antibiotics12030438)

**Supplementary 1: Visual List and Description of High-Touch Surfaces in the Intensive Care Unit**

|                                                                                                                                                                                                                                                                                                                        |                                                                                                                                                                                                                                                                                                                                          |
|------------------------------------------------------------------------------------------------------------------------------------------------------------------------------------------------------------------------------------------------------------------------------------------------------------------------|------------------------------------------------------------------------------------------------------------------------------------------------------------------------------------------------------------------------------------------------------------------------------------------------------------------------------------------|
| <p><b>Sampling areas:</b></p> <ul style="list-style-type: none"> <li>• Designated area to be sampled Before PX-UV (Red)</li> <li>• Designated area to be sampled After PX-UV (Blue)</li> </ul>                                                                                                                         |                                                                                                                                                                                                                                                                                                                                          |
| <p><b>Infusion pump</b></p> <ul style="list-style-type: none"> <li>• Area on top of the infusion pump bottom.</li> <li>• <b>Before PX-UV:</b> Sample the left area on top of the infusion pump bottom.</li> <li>• <b>After PX-UV:</b> Sample the right area on top of the infusion pump bottom.</li> <li>• </li> </ul> | 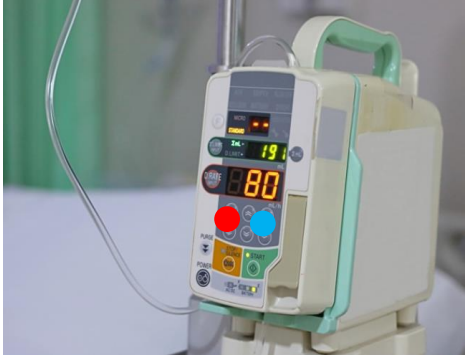 <p>A photograph of a medical infusion pump. The pump is white and green. On the top surface of the pump's base, there are two circular sampling points: a red one on the left and a blue one on the right. The pump's screen shows '19' and '80'.</p> |
| <p><b>Overbed Table</b></p> <ul style="list-style-type: none"> <li>• Area on top (facing the ceiling) of the middle of the table</li> <li>• <b>Before PX-UV:</b> Sample the left top area of the overbed table</li> <li>• <b>After PX-UV:</b> Sample the right top area of the overbed table</li> </ul>                | 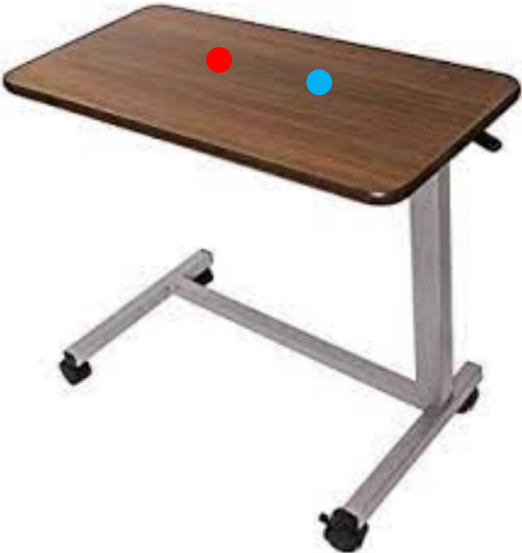 <p>A photograph of an overbed table with a wooden top and a metal frame. On the top surface, there are two circular sampling points: a red one on the left and a blue one on the right.</p>                                                          |
| <p><b>Bedside Table</b></p> <ul style="list-style-type: none"> <li>• Area on top (facing the ceiling) of the middle of the table</li> <li>• <b>Before PX-UV:</b> Sample the left top area of the bedside table</li> <li>• <b>After PX-UV:</b> Sample the right top area of the bedside table</li> </ul>                | 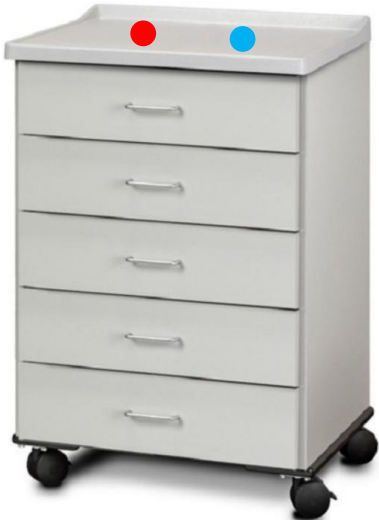 <p>A photograph of a bedside table with a white top and a white body with drawers. On the top surface, there are two circular sampling points: a red one on the left and a blue one on the right.</p>                                               |

### Medication Cart

- Midpoint area facing the sampler of the medication cart
- **Before PX-UV:** Sample the left-side area of the bedside stand below the drawer handle
- **After PX-UV:** Sample the right-side area of the bedside stand below the drawer handle

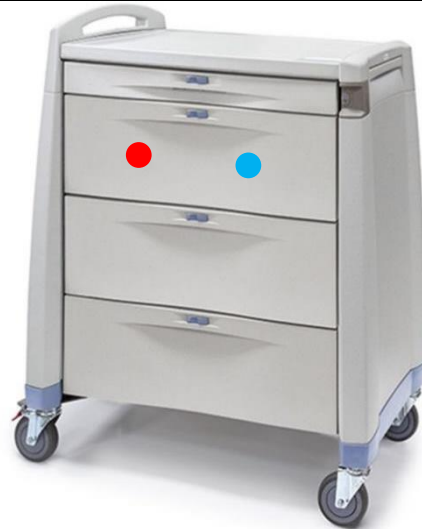

### Vital Signs Screen

- Area facing the sampler in the bottommost region of the controls along the screen edge
- **Before PX-UV:** Sample the area adjacent to mid-line of the screen edge
- **After PX-UV:** Sample the right-side area of the midpoint before buttons region along the screen edge

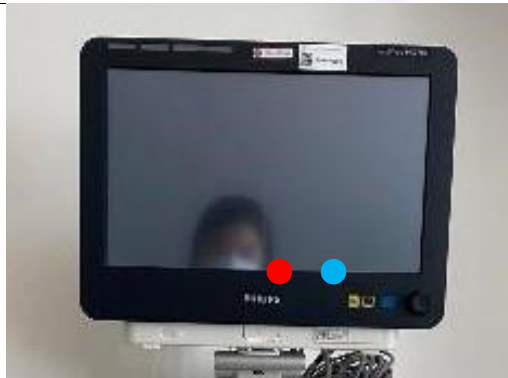

Supplement: Supplementary file 1 [file antibiotics-12-00438-s001.zip › antibiotics-2204602-supplementary.pdf]
